# Supplementary material for: Prediction of the Imprinting Quality of Molecularly Imprinted Polymers via a Data-driven Similarity-based Clustering Approach
Source: Research Square preprint supplement (doi:10.21203/rs.3.rs-8501266/v1), 2026-01-09
Supplement: Supplementary file 1 [file 1506a60b02d72bc8ee72f686.pdf]

## Supporting Information

### Prediction of the Imprinting Quality of Molecularly Imprinted Polymers via a Data-driven Similarity-based Clustering Approach

*Bahar Dadfar<sup>a,†</sup>, Meriem Kassar<sup>a,†</sup>, Berna Alemdag<sup>a,†</sup>, Gözde Kabay<sup>a,\*</sup>*

<sup>a</sup>Karlsruhe Institute of Technology (KIT), Institute of Functional Interfaces (IFG), Department for Bioengineering and Biosystems, 76344 Eggenstein-Leopoldshafen, Germany

E-mail: gozde.kabay@kit.edu

**Table S1.** Overview of commonly reported definitions of the IF in MIPs. The table lists the definition, experimental determination methods, and success criteria. In this study, IF values based on binding capacity and dissociation constant were used.

| Equation                                                                                                                                                                   | Experimental Methods                                                                                                                                                         | Success Criteria                                                                                                                                                                                                                         |
|----------------------------------------------------------------------------------------------------------------------------------------------------------------------------|------------------------------------------------------------------------------------------------------------------------------------------------------------------------------|------------------------------------------------------------------------------------------------------------------------------------------------------------------------------------------------------------------------------------------|
| <b><i>Binding capacity-based:</i></b><br>$IF_Q = \frac{Q_{MIP}}{Q_{NIP}}$ $Q = \frac{(C_i - C_f)V}{m}$                                                                     | Batch rebinding: incubate MIP/NIP with known analyte initial concentration $C_i$ , measure analyte free concentration $C_f$ at equilibrium (using UV-Vis, HPLC, etc.).       | $IF_Q > 1$ : the higher the ratio, the stronger the contribution of specific recognition sites relative to nonspecific binding. Values significantly greater than 2–3 are often interpreted as strong evidence of imprinting efficiency. |
| <b><i>Dissociation constant-based:</i></b><br>$IF_{K_d} = \frac{K_{d,NIP}}{K_{d,MIP}}$ <i>Langmuir-type isotherm fitting:</i><br>$Q = \frac{Q_{max} \cdot C_f}{K_d + C_f}$ | Adsorption isotherm experiments are fitted to models (mostly Langmuir,) to extract $K_d$ , describing the affinity of the binding sites. Lower $K_d$ means stronger binding. | $IF_{K_d} > 1$ : A lower $K_d$ for the MIP compared to the NIP indicates stronger binding (higher affinity). Ratios > 2 are typically considered indicative of efficient imprinting.                                                     |

\* $C_i$  initial analyte concentration (mg/L),  $C_f$  free analyte concentration at equilibrium (mg/L),  $V$  volume of adsorption solution (L),  $m$  polymer mass (g),  $Q$  equilibrium adsorption capacity (mg/g),  $Q_{max}$  maximum binding capacity (mg/g),  $K_d$  dissociation constant (M),  $k'$  capacity factor,  $t_R$  retention time,  $t_0$  column void time.

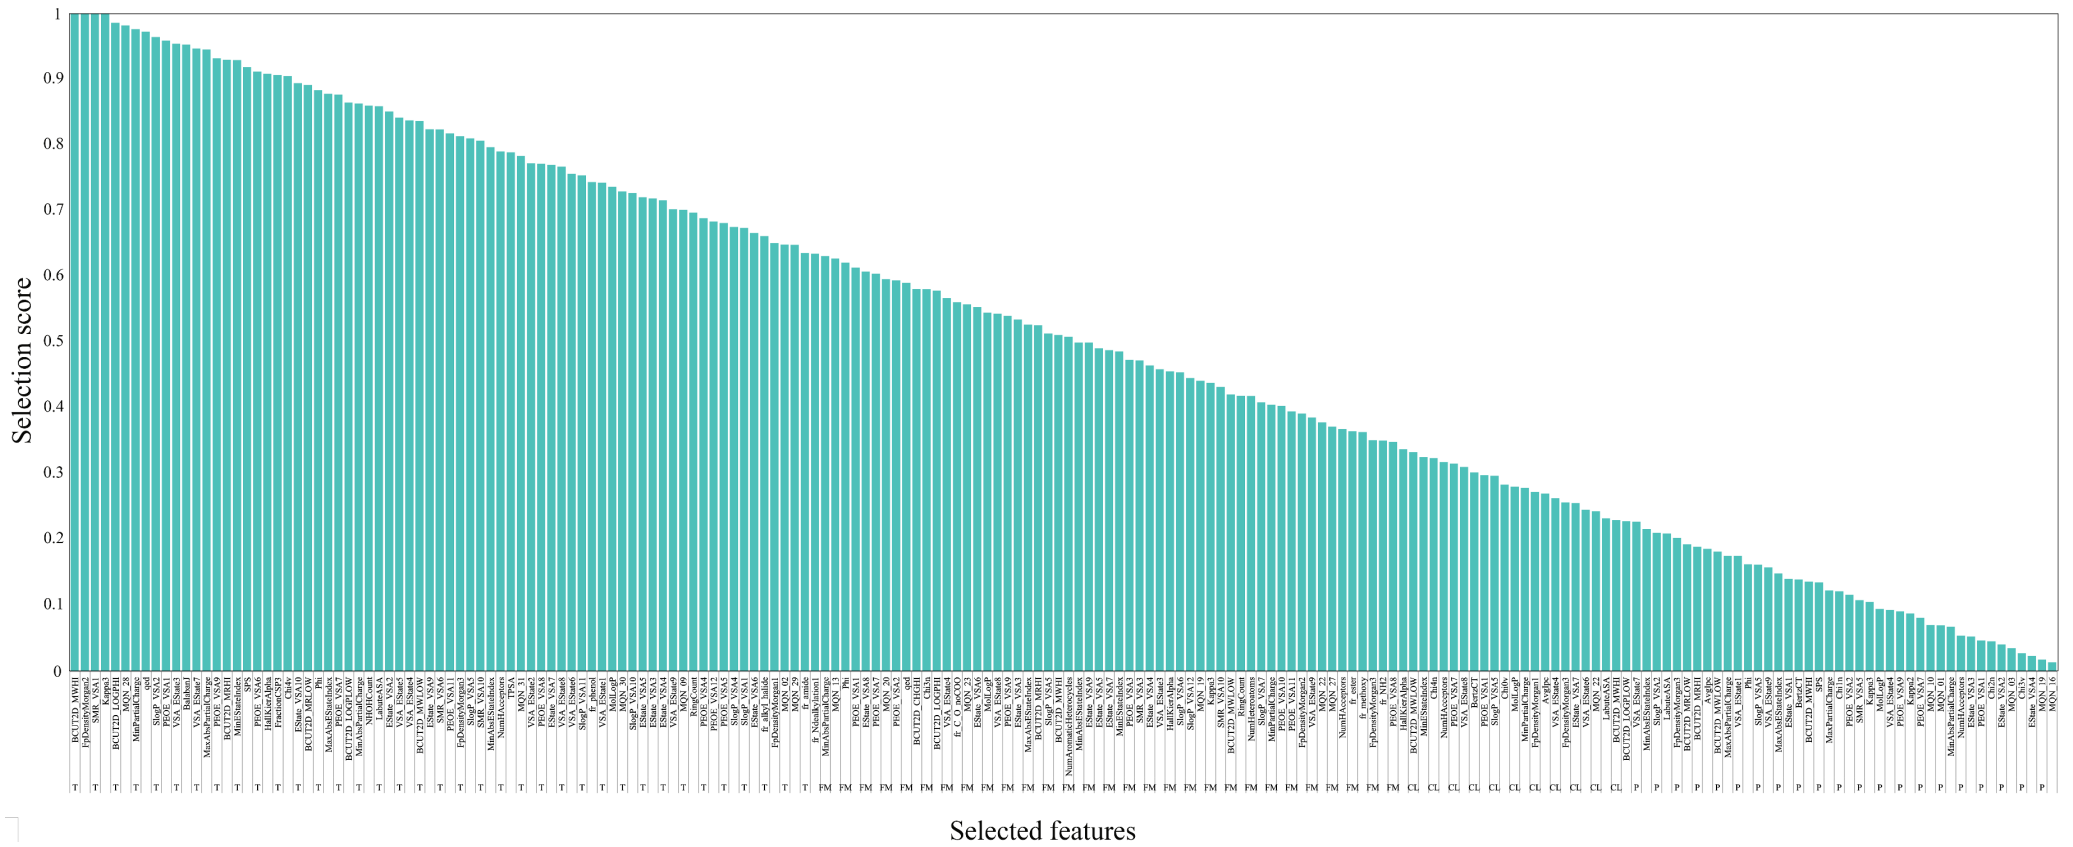

**Figure S1.** The stability-enhanced MRMR assigned scores for the selected features used in the similarity-based prediction model.
